# Supplementary material
Source: Springer Nature journal article supplement (https://www.springermedizin.de/resource/supplementary/12884_2013_876_MOESM3_ESM.pdf/9458412)
Supplement: MOESM3 [file 9458412]

Women who started their pregnancy in midwife-led care  
and filled in questionnaire 2 & 3  
September 2009 – March 2011  
N = 2398

Exclusion of women who  
started their labour in  
secondary care N = 887

N = 1511
